# Supplementary material
Source: PubMed Central journal article supplement (PMC1326187)

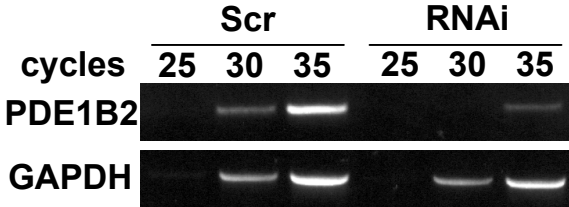

Supplement: pnas_0509972102_1.pdf [file pnas_0509972102_1.pdf]

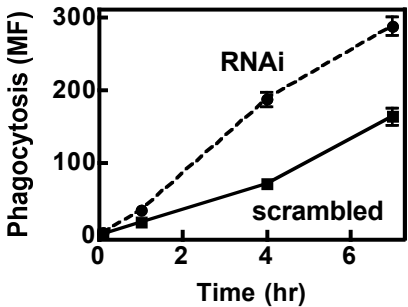

Supplement: pnas_0509972102_2.pdf [file pnas_0509972102_2.pdf]

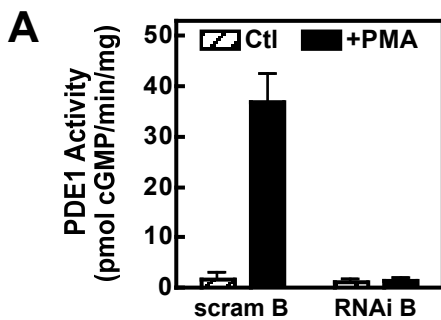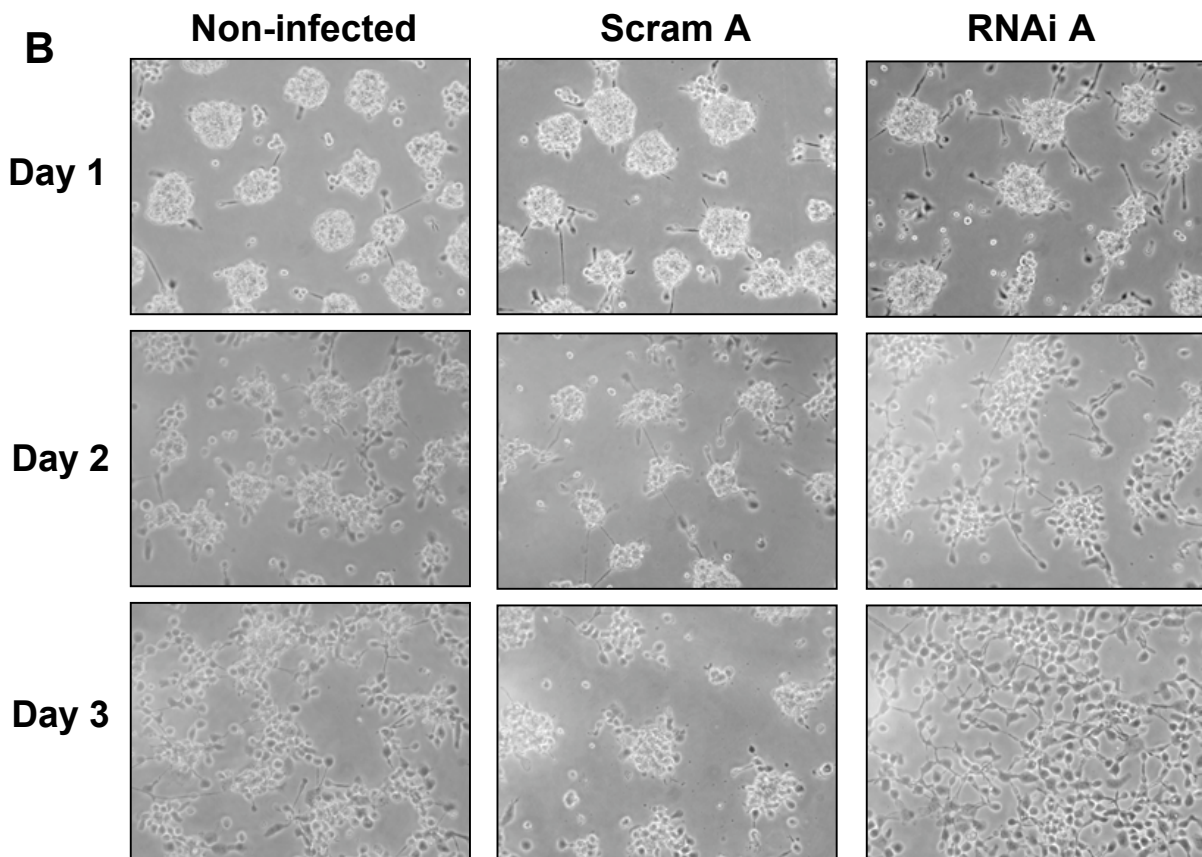

**C**

| Condition  | CD11b      | CD87      | CD71     |
|------------|------------|-----------|----------|
| Scr        | 9.4 ± 2.0  | 6.6 ± 1.5 | 299 ± 17 |
| Scr + PMA  | 498 ± 68   | 47 ± 7.0  | 18 ± 1.4 |
| RNAi       | 15 ± 4.9   | 6.6 ± 0.5 | 135 ± 22 |
| RNAi + PMA | 834 ± 150* | 56 ± 8.5  | 18 ± 1.4 |

**D**

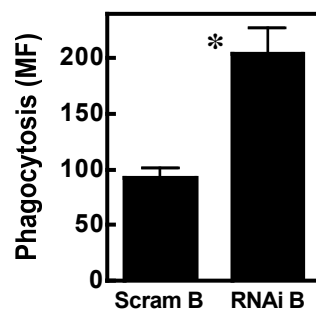

Supplement: pnas_0509972102_3.pdf [file pnas_0509972102_3.pdf]

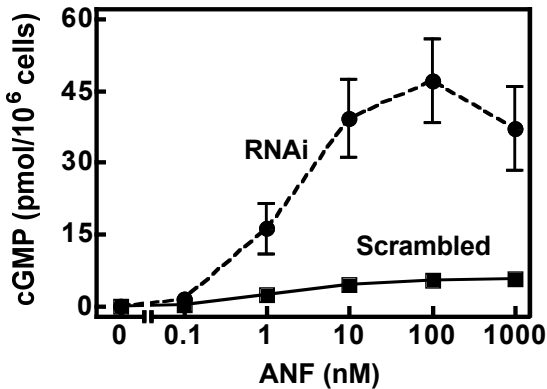

Supplement: pnas_0509972102_4.pdf [file pnas_0509972102_4.pdf]

■ Scr A    □ Scr B  
▨ RNAi A    ▩ RNAi B

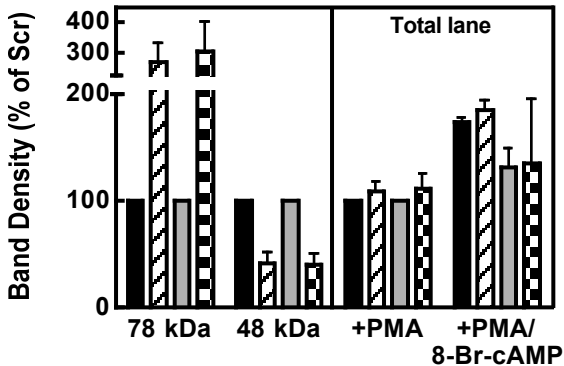

Supplement: pnas_0509972102_5.pdf [file pnas_0509972102_5.pdf]

■ PDE2    ▨ PDE3    □ PDE4    ■ Total

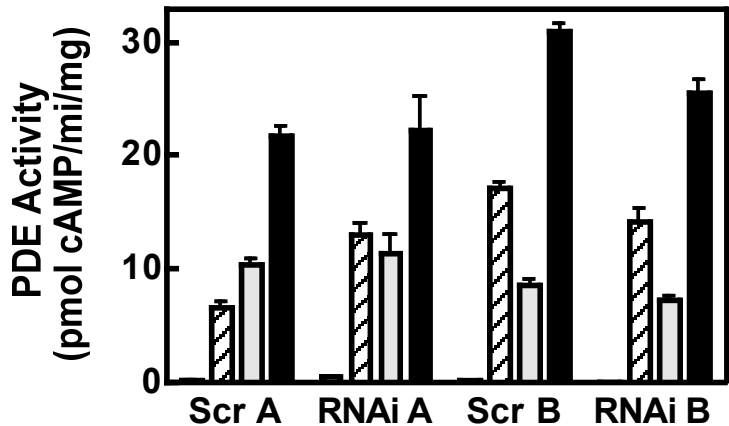

Supplement: pnas_0509972102_6.pdf [file pnas_0509972102_6.pdf]
